# Supplementary material
Source: PubMed Central journal article supplement (PMC9298603)
Supplement: NIHMS1800956-supplement-SDC_1.pdf [file NIHMS1800956-supplement-SDC_1.pdf]

July 2002- December 2016 GEJ/gastric adenocarcinoma  
resected with curative intent  
n = 2,028

143 patients excluded

- Non-curative resection, n = 82
- pStage IV, n = 17
- Wedge resection, n = 31
- Resection for remnant GEJ/gastric cancer, n = 13

R0 resection for primary adenocarcinoma  
n = 1,885

Upfront surgery  
n = 886

Neoadjuvant treatment  
n = 999

Gastric cancer  
n = 645

GEJ cancer  
n = 241

Gastric cancer  
n = 323

GEJ cancer  
n = 676
